# Supplementary material for: Pelvic Fractures—An Underestimated Problem? Incidence and Mortality Risk after Pelvic Fracture in Austria, 2010–2018
Source: MDPI journal article supplement (doi:10.3390/jcm11102834), 2022-05-17

**Supplemental Table S1.** Elixhauser comorbidities in a cohort of patients with pelvic fractures and their age-sex-matched fracture-free controls

|                                                     | Pelvic fracture patients<br>N (%) | Fracture-free controls<br>N (%) | p-values |
|-----------------------------------------------------|-----------------------------------|---------------------------------|----------|
| Congestive heart failure                            | 12,315 (22.4)                     | 5940 (17.8)                     | <0.001   |
| Cardiac arrhythmias                                 | 17,083 (31.1)                     | 8658 (25.9)                     | <0.001   |
| Valvular disease                                    | 7075 (12.9)                       | 3350 (10.0)                     | <0.001   |
| Pulmonary circulation disorders                     | 3839 (7.0)                        | 1761 (5.3)                      | <0.001   |
| Peripheral vascular disorders                       | 7877 (14.3)                       | 3791 (11.3)                     | <0.001   |
| Hypertension, uncomplicated                         | 32,943 (60.0)                     | 17,452 (52.2)                   | <0.001   |
| Hypertension, complicated                           | 2845 (5.2)                        | 1309 (3.9)                      | <0.001   |
| Paralysis                                           | 825 (1.5)                         | 268 (0.8)                       | <0.001   |
| Other neurological disorders                        | 6320 (11.5)                       | 2252 (6.7)                      | <0.001   |
| Chronic pulmonary disease                           | 8896 (16.2)                       | 3984 (11.9)                     | <0.001   |
| Diabetes, uncomplicated                             | 9019 (16.4)                       | 4898 (14.7)                     | <0.001   |
| Diabetes, complicated                               | 5022 (9.1)                        | 2596 (7.8)                      | <0.001   |
| Hypothyroidism                                      | 5450 (9.9)                        | 2234 (6.7)                      | <0.001   |
| Renal failure                                       | 11,317 (20.6)                     | 5190 (15.5)                     | <0.001   |
| Liver disease                                       | 5144 (9.4)                        | 2161 (6.5)                      | <0.001   |
| Peptic ulcer disease, excluding bleed-<br>ing       | 983 (1.8)                         | 412 (1.2)                       | <0.001   |
| AIDS/HIV                                            | 36 (0.1)                          | 10 (0.0)                        | 0.024    |
| Lymphoma                                            | 913 (1.7)                         | 411 (1.2)                       | <0.001   |
| Metastatic cancer                                   | 2032 (3.7)                        | 1520 (4.5)                      | <0.001   |
| Solid tumour, without metastasis                    | 7012 (12.8)                       | 4957 (14.8)                     | <0.001   |
| Rheumatoid arthritis/collaged vascu-<br>lar disease | 2243 (4.1)                        | 829 (2.5)                       | <0.001   |
| Coagulopathy                                        | 2289 (4.2)                        | 730 (2.2)                       | <0.001   |
| Obesity                                             | 3328 (6.1)                        | 2077 (6.2)                      | 0.348    |
| Weight loss                                         | 1954 (3.6)                        | 677 (2.0)                       | <0.001   |
| Fluid and electrolyte disorders                     | 10,029 (18.3)                     | 3758 (11.2)                     | <0.001   |
| Blood loss anaemia                                  | 973 (1.8)                         | 391 (1.2)                       | <0.001   |
| Deficiency anaemia                                  | 3743 (6.8)                        | 1343 (4.0)                      | <0.001   |
| Alcohol abuse                                       | 2537 (4.6)                        | 541 (1.6)                       | <0.001   |
| Drug abuse                                          | 958 (1.7)                         | 248 (0.7)                       | <0.001   |
| Psychoses                                           | 691 (1.3)                         | 268 (0.8)                       | <0.001   |
| Depression                                          | 9444 (17.2)                       | 3132 (9.4)                      | <0.001   |

**Supplemental Table S2.** Age and sex specific crude (CIR) and standardised incidence rates (SIR) per 100 000 of pelvic fracture in Austria between 2010 and 2018

| 2010                  | MEN                     |                    |                       |                       | WOMEN                   |                    |                       |                       | TOTAL                   |                    |                       |                       | IRR* |  |  |  |
|-----------------------|-------------------------|--------------------|-----------------------|-----------------------|-------------------------|--------------------|-----------------------|-----------------------|-------------------------|--------------------|-----------------------|-----------------------|------|--|--|--|
| Age (Years)           | No.popula-<br>tion 2010 | Pelvic<br>fracture | CIR<br>per<br>100.000 | SIR<br>per<br>100.000 | No.popula-<br>tion 2010 | Pelvic<br>fracture | CIR<br>per<br>100.000 | SIR<br>per<br>100.000 | No.popula-<br>tion 2010 | Pelvic<br>fracture | CIR<br>per<br>100.000 | SIR<br>per<br>100.000 |      |  |  |  |
| 50-54                 | 299702                  | 169                | 56.4                  | 378.8                 | 302205                  | 140                | 46.3                  | 311.2                 | 601907                  | 309                | 51.3                  | 344.8                 |      |  |  |  |
| 55-59                 | 242329                  | 163                | 67.3                  | 384.9                 | 253156                  | 154                | 60.8                  | 348.1                 | 495485                  | 317                | 64.0                  | 366.1                 |      |  |  |  |
| 60-64                 | 222252                  | 158                | 71.1                  | 345.9                 | 237862                  | 203                | 85.3                  | 415.3                 | 460114                  | 361                | 78.5                  | 381.8                 |      |  |  |  |
| 65-69                 | 207704                  | 208                | 100.1                 | 432.3                 | 234758                  | 360                | 153.3                 | 662.0                 | 442462                  | 568                | 128.4                 | 554.2                 |      |  |  |  |
| 70-74                 | 165923                  | 230                | 138.6                 | 555.3                 | 197635                  | 458                | 231.7                 | 928.4                 | 363558                  | 688                | 189.2                 | 758.1                 |      |  |  |  |
| 75-79                 | 112078                  | 204                | 182.0                 | 561.8                 | 155165                  | 598                | 385.4                 | 1189.6                | 267243                  | 802                | 300.1                 | 926.4                 |      |  |  |  |
| 80-84                 | 79845                   | 211                | 264.3                 | 568.1                 | 137500                  | 888                | 645.8                 | 1388.4                | 217345                  | 1099               | 505.6                 | 1087.1                |      |  |  |  |
| 85-89                 | 37712                   | 159                | 421.6                 | 598.0                 | 101172                  | 950                | 939.0                 | 1331.8                | 138884                  | 1109               | 798.5                 | 1132.5                |      |  |  |  |
| 90-94                 | 8575                    | 37                 | 431.5                 | 242.8                 | 28004                   | 267                | 953.4                 | 536.6                 | 36579                   | 304                | 831.1                 | 467.7                 |      |  |  |  |
| ≥95                   | 2221                    | 12                 | 540.3                 | 63.4                  | 9310                    | 79                 | 848.5                 | 99.5                  | 11531                   | 91                 | 789.2                 | 92.6                  |      |  |  |  |
| Over-<br>all<br>(≥50) | 1378341                 | 1551               | 112.5                 | 125.3                 | 1656767                 | 4097               | 247.3                 | 218.7                 | 3035108                 | 5648               | 186.1                 | 185.4                 | 1.7  |  |  |  |
| 2011                  | MEN                     |                    |                       |                       | WOMEN                   |                    |                       |                       | TOTAL                   |                    |                       |                       | IRR* |  |  |  |
| Age (Years)           | No.popula-<br>tion 2011 | Pelvic<br>fracture | CIR<br>per<br>100.000 | SIR<br>per<br>100.000 | No.popula-<br>tion 2011 | Pelvic<br>fracture | CIR<br>per<br>100.000 | SIR<br>per<br>100.000 | No.popula-<br>tion 2011 | Pelvic<br>fracture | CIR<br>per<br>100.000 | SIR<br>per<br>100.000 |      |  |  |  |
| 50-54                 | 309695                  | 181                | 58.4                  | 392.6                 | 310608                  | 143                | 46.0                  | 309.2                 | 620303                  | 324                | 52.2                  | 350.9                 |      |  |  |  |
| 55-59                 | 249804                  | 181                | 72.5                  | 414.7                 | 260977                  | 162                | 62.1                  | 355.2                 | 510781                  | 343                | 67.2                  | 384.3                 |      |  |  |  |
| 60-64                 | 231426                  | 185                | 79.9                  | 389.0                 | 248244                  | 231                | 93.1                  | 452.8                 | 479670                  | 416                | 86.7                  | 422.0                 |      |  |  |  |
| 65-69                 | 192127                  | 202                | 105.1                 | 453.9                 | 217144                  | 305                | 140.5                 | 606.4                 | 409271                  | 507                | 123.9                 | 534.8                 |      |  |  |  |
| 70-74                 | 182343                  | 256                | 140.4                 | 562.4                 | 215946                  | 466                | 215.8                 | 864.5                 | 398289                  | 722                | 181.3                 | 726.2                 |      |  |  |  |
| 75-79                 | 111044                  | 216                | 194.5                 | 600.4                 | 151841                  | 650                | 428.1                 | 1321.4                | 262885                  | 866                | 329.4                 | 1016.9                |      |  |  |  |
| 80-84                 | 82450                   | 221                | 268.0                 | 576.3                 | 135620                  | 826                | 609.1                 | 1309.4                | 218070                  | 1047               | 480.1                 | 1032.2                |      |  |  |  |
| 85-89                 | 39326                   | 159                | 404.3                 | 573.4                 | 101586                  | 874                | 860.4                 | 1220.3                | 140912                  | 1033               | 733.1                 | 1039.7                |      |  |  |  |
| 90-94                 | 10365                   | 62                 | 598.2                 | 336.6                 | 33374                   | 290                | 868.9                 | 489.0                 | 43739                   | 352                | 804.8                 | 452.9                 |      |  |  |  |
| ≥95                   | 2022                    | 10                 | 494.6                 | 58.0                  | 8707                    | 87                 | 999.2                 | 117.2                 | 10729                   | 97                 | 904.1                 | 106.1                 |      |  |  |  |
| Over-<br>all<br>(≥50) | 1410602                 | 1673               | 118.6                 | 132.2                 | 1684047                 | 4034               | 239.5                 | 213.7                 | 3094649                 | 5707               | 184.4                 | 184.0                 | 1.60 |  |  |  |

| 2012                  | MEN                     |                    |                |                | WOMEN                 |                         |                    |                | TOTAL          |                       |                         |                    | IRR*           |                |                       |     |
|-----------------------|-------------------------|--------------------|----------------|----------------|-----------------------|-------------------------|--------------------|----------------|----------------|-----------------------|-------------------------|--------------------|----------------|----------------|-----------------------|-----|
| Age<br>(Years)        | No.popula-<br>tion 2012 | Pelvic<br>fracture | CIR<br>100.000 | per<br>100.000 | SIR<br>per<br>100.000 | No.popula-<br>tion 2012 | Pelvic<br>fracture | CIR<br>100.000 | per<br>100.000 | SIR<br>per<br>100.000 | No.popula-<br>tion 2012 | Pelvic<br>fracture | CIR<br>100.000 | per<br>100.000 | SIR<br>per<br>100.000 |     |
| 50-54                 | 320858                  | 173                | 53.9           |                | 362.2                 | 319817                  | 133                | 41.6           |                | 279.3                 | 640675                  | 306                | 47.8           |                | 320.8                 |     |
| 55-59                 | 259444                  | 182                | 70.2           |                | 401.5                 | 270177                  | 156                | 57.7           |                | 330.4                 | 529621                  | 338                | 63.8           |                | 365.2                 |     |
| 60-64                 | 228939                  | 186                | 81.2           |                | 395.4                 | 246410                  | 204                | 82.8           |                | 402.9                 | 475349                  | 390                | 82.0           |                | 399.3                 |     |
| 65-69                 | 191806                  | 167                | 87.1           |                | 375.9                 | 215973                  | 292                | 135.2          |                | 583.7                 | 407779                  | 459                | 112.6          |                | 485.9                 |     |
| 70-74                 | 194202                  | 251                | 129.2          |                | 517.8                 | 229812                  | 520                | 226.3          |                | 906.5                 | 424014                  | 771                | 181.8          |                | 728.4                 |     |
| 75-79                 | 111043                  | 213                | 191.8          |                | 592.1                 | 149589                  | 608                | 406.4          |                | 1254.6                | 260632                  | 821                | 315.0          |                | 972.4                 |     |
| 80-84                 | 84012                   | 238                | 283.3          |                | 609.0                 | 134477                  | 900                | 669.3          |                | 1438.8                | 218489                  | 1138               | 520.9          |                | 1119.8                |     |
| 85-89                 | 41200                   | 191                | 463.6          |                | 657.5                 | 99603                   | 892                | 895.6          |                | 1270.2                | 140803                  | 1083               | 769.2          |                | 1090.9                |     |
| 90-94                 | 11945                   | 65                 | 544.2          |                | 306.2                 | 38779                   | 416                | 1072.7         |                | 603.7                 | 50724                   | 481                | 948.3          |                | 533.7                 |     |
| ≥95                   | 1832                    | 10                 | 545.9          |                | 64.0                  | 7988                    | 79                 | 989.0          |                | 116.0                 | 9820                    | 89                 | 906.3          |                | 106.3                 |     |
| Over-<br>all<br>(≥50) | 1445281                 | 1676               | 116.0          |                | 129.9                 | 1712625                 | 4200               | 245.2          |                | 218.0                 | 3157906                 | 5876               | 186.1          |                | 185.7                 | 1.7 |
| 2013                  | MEN                     |                    |                |                | WOMEN                 |                         |                    |                | TOTAL          |                       |                         |                    | IRR*           |                |                       |     |
| Age<br>(Years)        | No.popula-<br>tion 2013 | Pelvic<br>fracture | CIR<br>100.000 | per<br>100.000 | SIR<br>per<br>100.000 | No.popula-<br>tion 2013 | Pelvic<br>fracture | CIR<br>100.000 | per<br>100.000 | SIR<br>per<br>100.000 | No.popula-<br>tion 2013 | Pelvic<br>fracture | CIR<br>100.000 | per<br>100.000 | SIR<br>per<br>100.000 |     |
| 50-54                 | 332435                  | 159                | 47.8           |                | 321.3                 | 330426                  | 124                | 37.5           |                | 252.1                 | 662861                  | 283                | 42.7           |                | 286.8                 |     |
| 55-59                 | 269216                  | 178                | 66.1           |                | 378.4                 | 279104                  | 163                | 58.4           |                | 334.2                 | 548320                  | 341                | 62.2           |                | 355.9                 |     |
| 60-64                 | 227365                  | 172                | 75.6           |                | 368.1                 | 244311                  | 193                | 79.0           |                | 384.4                 | 471676                  | 365                | 77.4           |                | 376.6                 |     |
| 65-69                 | 196227                  | 198                | 100.9          |                | 435.6                 | 220682                  | 293                | 132.8          |                | 573.2                 | 416909                  | 491                | 117.8          |                | 508.4                 |     |
| 70-74                 | 200794                  | 262                | 130.5          |                | 522.7                 | 237732                  | 533                | 224.2          |                | 898.2                 | 438526                  | 795                | 181.3          |                | 726.3                 |     |
| 75-79                 | 112706                  | 212                | 188.1          |                | 580.6                 | 149675                  | 546                | 364.8          |                | 1126.0                | 262381                  | 758                | 288.9          |                | 891.8                 |     |
| 80-84                 | 84642                   | 252                | 297.7          |                | 640.1                 | 133426                  | 888                | 665.5          |                | 1430.8                | 218068                  | 1140               | 522.8          |                | 1123.9                |     |
| 85-89                 | 43200                   | 169                | 391.2          |                | 554.9                 | 97085                   | 850                | 875.5          |                | 1241.8                | 140285                  | 1019               | 726.4          |                | 1030.2                |     |
| 90-94                 | 13292                   | 78                 | 586.8          |                | 330.2                 | 43491                   | 449                | 1032.4         |                | 581.0                 | 56783                   | 527                | 928.1          |                | 522.3                 |     |
| ≥95                   | 1700                    | 13                 | 764.7          |                | 89.7                  | 7397                    | 72                 | 973.4          |                | 114.2                 | 9097                    | 85                 | 934.4          |                | 109.6                 |     |
| Over-<br>all<br>(≥50) | 1481577                 | 1693               | 114.3          |                | 128.1                 | 1743329                 | 4111               | 235.8          |                | 210.4                 | 3224906                 | 5804               | 180.0          |                | 179.9                 | 1.6 |
| 2014                  | MEN                     |                    |                |                | WOMEN                 |                         |                    |                | TOTAL          |                       |                         |                    | IRR*           |                |                       |     |

| Age<br>(Years)        | No.popula-<br>tion 2014 | Pelvic<br>fracture | CIR<br>per<br>100.000 | SIR<br>per<br>100.000 | No.popula-<br>tion 2014 | Pelvic<br>fracture | CIR<br>per<br>100.000 | SIR<br>per<br>100.000 | No.popula-<br>tion 2014 | Pelvic<br>fracture | CIR<br>per<br>100.000 | SIR<br>per<br>100.000 |     |  |
|-----------------------|-------------------------|--------------------|-----------------------|-----------------------|-------------------------|--------------------|-----------------------|-----------------------|-------------------------|--------------------|-----------------------|-----------------------|-----|--|
| 50-54                 | 342721                  | 190                | 55.4                  | 372.4                 | 340200                  | 134                | 39.4                  | 264.6                 | 682921                  | 324                | 47.4                  | 318.7                 |     |  |
| 55-59                 | 280448                  | 187                | 66.7                  | 381.6                 | 289394                  | 179                | 61.9                  | 354.0                 | 569842                  | 366                | 64.2                  | 367.6                 |     |  |
| 60-64                 | 227242                  | 190                | 83.6                  | 406.9                 | 243847                  | 196                | 80.4                  | 391.1                 | 471089                  | 386                | 81.9                  | 398.7                 |     |  |
| 65-69                 | 199333                  | 176                | 88.3                  | 381.2                 | 223415                  | 293                | 131.1                 | 566.2                 | 422748                  | 469                | 110.9                 | 478.9                 |     |  |
| 70-74                 | 199834                  | 292                | 146.1                 | 585.4                 | 237317                  | 570                | 240.2                 | 962.2                 | 437151                  | 862                | 197.2                 | 789.9                 |     |  |
| 75-79                 | 123310                  | 228                | 184.9                 | 570.7                 | 160411                  | 642                | 400.2                 | 1235.4                | 283721                  | 870                | 306.6                 | 946.5                 |     |  |
| 80-84                 | 84581                   | 260                | 307.4                 | 660.9                 | 131703                  | 908                | 689.4                 | 1482.2                | 216284                  | 1168               | 540.0                 | 1161.0                |     |  |
| 85-89                 | 45605                   | 193                | 423.2                 | 600.2                 | 95820                   | 945                | 986.2                 | 1398.8                | 141425                  | 1138               | 804.7                 | 1141.3                |     |  |
| 90-94                 | 14363                   | 86                 | 598.8                 | 337.0                 | 47022                   | 491                | 1044.2                | 587.6                 | 61385                   | 577                | 940.0                 | 529.0                 |     |  |
| ≥95                   | 1766                    | 10                 | 566.3                 | 66.4                  | 7516                    | 67                 | 891.4                 | 104.6                 | 9282                    | 77                 | 829.6                 | 97.3                  |     |  |
| Over-<br>all<br>(≥50) | 1519203                 | 1812               | 119.3                 | 132.3                 | 1776645                 | 4425               | 249.1                 | 222.9                 | 3295848                 | 6237               | 189.2                 | 189.0                 | 1.7 |  |
| 2015                  | MEN                     |                    | WOMEN                 |                       |                         |                    | TOTAL                 |                       |                         |                    | IRR*                  |                       |     |  |
| Age<br>(Years)        | No.popula-<br>tion 2015 | Pelvic<br>fracture | CIR<br>per<br>100.000 | SIR<br>per<br>100.000 | No.popula-<br>tion 2015 | Pelvic<br>fracture | CIR<br>per<br>100.000 | SIR<br>per<br>100.000 | No.popula-<br>tion 2015 | Pelvic<br>fracture | CIR<br>per<br>100.000 | SIR<br>per<br>100.000 |     |  |
| 50-54                 | 350932                  | 152                | 43.3                  | 290.9                 | 347843                  | 138                | 39.7                  | 266.5                 | 698775                  | 290                | 41.5                  | 278.8                 |     |  |
| 55-59                 | 292719                  | 181                | 61.8                  | 353.9                 | 300051                  | 157                | 52.3                  | 299.4                 | 592770                  | 338                | 57.0                  | 326.3                 |     |  |
| 60-64                 | 231007                  | 155                | 67.1                  | 326.5                 | 247760                  | 213                | 86.0                  | 418.4                 | 478767                  | 368                | 76.9                  | 374.0                 |     |  |
| 65-69                 | 205468                  | 216                | 105.1                 | 453.8                 | 229354                  | 291                | 126.9                 | 547.7                 | 434822                  | 507                | 116.6                 | 503.4                 |     |  |
| 70-74                 | 185921                  | 228                | 122.6                 | 491.3                 | 221689                  | 499                | 225.1                 | 901.7                 | 407610                  | 727                | 178.4                 | 714.5                 |     |  |
| 75-79                 | 141519                  | 278                | 196.4                 | 606.4                 | 180927                  | 679                | 375.3                 | 1158.4                | 322446                  | 957                | 296.8                 | 916.1                 |     |  |
| 80-84                 | 83856                   | 261                | 311.2                 | 669.1                 | 129338                  | 899                | 695.1                 | 1494.3                | 213194                  | 1160               | 544.1                 | 1169.8                |     |  |
| 85-89                 | 47602                   | 192                | 403.3                 | 572.1                 | 94475                   | 877                | 928.3                 | 1316.6                | 142077                  | 1069               | 752.4                 | 1067.2                |     |  |
| 90-94                 | 15216                   | 85                 | 558.6                 | 314.4                 | 48034                   | 526                | 1095.1                | 616.3                 | 63250                   | 611                | 966.0                 | 543.6                 |     |  |
| ≥95                   | 2136                    | 20                 | 936.3                 | 109.8                 | 8902                    | 82                 | 921.1                 | 108.1                 | 11038                   | 102                | 924.1                 | 108.4                 |     |  |
| Over-<br>all<br>(≥50) | 1556376                 | 1768               | 113.6                 | 127.1                 | 1808373                 | 4361               | 241.2                 | 216.2                 | 3364749                 | 6129               | 182.2                 | 182.1                 | 1.7 |  |
| 2016                  | MEN                     |                    | WOMEN                 |                       |                         |                    | TOTAL                 |                       |                         |                    | IRR*                  |                       |     |  |

| Age<br>(Years)        | No.popula-<br>tion 2016 | Pelvic<br>fracture | CIR<br>per<br>100.000 | SIR<br>per<br>100.000 | No.popula-<br>tion 2016 | Pelvic<br>fracture | CIR<br>per<br>100.000 | SIR<br>per<br>100.000 | No.popula-<br>tion 2016 | Pelvic<br>fracture | CIR<br>per<br>100.000 | SIR<br>per<br>100.000 |      |  |
|-----------------------|-------------------------|--------------------|-----------------------|-----------------------|-------------------------|--------------------|-----------------------|-----------------------|-------------------------|--------------------|-----------------------|-----------------------|------|--|
| 50-54                 | 356657                  | 205                | 57.5                  | 386.1                 | 352827                  | 142                | 40.2                  | 270.3                 | 709484                  | 347                | 48.9                  | 328.5                 |      |  |
| 55-59                 | 303684                  | 165                | 54.3                  | 310.9                 | 309201                  | 181                | 58.5                  | 335.0                 | 612885                  | 346                | 56.5                  | 323.1                 |      |  |
| 60-64                 | 239082                  | 176                | 73.6                  | 358.2                 | 255956                  | 195                | 76.2                  | 370.7                 | 495038                  | 371                | 74.9                  | 364.7                 |      |  |
| 65-69                 | 214380                  | 184                | 85.8                  | 370.5                 | 239313                  | 326                | 136.2                 | 588.1                 | 453693                  | 510                | 112.4                 | 485.3                 |      |  |
| 70-74                 | 171846                  | 220                | 128.0                 | 512.9                 | 204933                  | 438                | 213.7                 | 856.2                 | 376779                  | 658                | 174.6                 | 699.6                 |      |  |
| 75-79                 | 155917                  | 319                | 204.6                 | 631.5                 | 197790                  | 741                | 374.6                 | 1156.4                | 353707                  | 1060               | 299.7                 | 925.1                 |      |  |
| 80-84                 | 83624                   | 266                | 318.1                 | 683.9                 | 127262                  | 912                | 716.6                 | 1540.7                | 210886                  | 1178               | 558.6                 | 1200.9                |      |  |
| 85-89                 | 49501                   | 214                | 432.3                 | 613.2                 | 93989                   | 905                | 962.9                 | 1365.7                | 143490                  | 1119               | 779.8                 | 1106.1                |      |  |
| 90-94                 | 16094                   | 112                | 695.9                 | 391.6                 | 48611                   | 518                | 1065.6                | 599.7                 | 64705                   | 630                | 973.6                 | 547.9                 |      |  |
| ≥95                   | 2556                    | 20                 | 782.5                 | 91.8                  | 10615                   | 123                | 1158.7                | 135.9                 | 13171                   | 143                | 1085.7                | 127.4                 |      |  |
| Over-<br>all<br>(≥50) | 1593341                 | 1881               | 118.1                 | 132.0                 | 1840497                 | 4481               | 243.5                 | 219.0                 | 3433838                 | 6362               | 185.3                 | 185.3                 | 1.7  |  |
| 2017                  | MEN                     |                    |                       |                       | WOMEN                   |                    |                       |                       | TOTAL                   |                    |                       |                       | IRR* |  |
| Age<br>(Years)        | No.popula-<br>tion 2017 | Pelvic<br>fracture | CIR<br>per<br>100.000 | SIR<br>per<br>100.000 | No.popula-<br>tion 2017 | Pelvic<br>fracture | CIR<br>per<br>100.000 | SIR<br>per<br>100.000 | No.popula-<br>tion 2017 | Pelvic<br>fracture | CIR<br>per<br>100.000 | SIR<br>per<br>100.000 |      |  |
| 50-54                 | 358346                  | 188                | 52.5                  | 352.4                 | 355071                  | 152                | 42.8                  | 287.5                 | 713417                  | 340                | 47.7                  | 320.1                 |      |  |
| 55-59                 | 315477                  | 202                | 64.0                  | 366.4                 | 318701                  | 195                | 61.2                  | 350.2                 | 634178                  | 397                | 62.6                  | 358.3                 |      |  |
| 60-64                 | 249027                  | 185                | 74.3                  | 361.5                 | 265484                  | 213                | 80.2                  | 390.4                 | 514511                  | 398                | 77.4                  | 376.4                 |      |  |
| 65-69                 | 212572                  | 193                | 90.8                  | 392.0                 | 237670                  | 308                | 129.6                 | 559.5                 | 450242                  | 501                | 111.3                 | 480.4                 |      |  |
| 70-74                 | 171619                  | 235                | 136.9                 | 548.6                 | 203838                  | 445                | 218.3                 | 874.6                 | 375457                  | 680                | 181.1                 | 725.6                 |      |  |
| 75-79                 | 166022                  | 305                | 183.7                 | 567.1                 | 210431                  | 787                | 374.0                 | 1154.4                | 376453                  | 1092               | 290.1                 | 895.4                 |      |  |
| 80-84                 | 84346                   | 234                | 277.4                 | 596.4                 | 125677                  | 852                | 677.9                 | 1457.5                | 210023                  | 1086               | 517.1                 | 1111.7                |      |  |
| 85-89                 | 50589                   | 234                | 462.6                 | 656.0                 | 93570                   | 902                | 964.0                 | 1367.2                | 144159                  | 1136               | 788.0                 | 1117.7                |      |  |
| 90-94                 | 16972                   | 110                | 648.1                 | 364.7                 | 47719                   | 567                | 1188.2                | 668.7                 | 64691                   | 677                | 1046.5                | 588.9                 |      |  |
| ≥95                   | 2861                    | 24                 | 838.9                 | 98.4                  | 11948                   | 135                | 1129.9                | 132.5                 | 14809                   | 159                | 1073.7                | 126.0                 |      |  |
| Over-<br>all<br>(≥50) | 1627831                 | 1910               | 117.3                 | 130.6                 | 1870109                 | 4556               | 243.6                 | 219.7                 | 3497940                 | 6466               | 184.9                 | 185.1                 | 1.7  |  |
| 2018                  | MEN                     |                    |                       |                       | WOMEN                   |                    |                       |                       | TOTAL                   |                    |                       |                       | IRR* |  |

| Age<br>(Years)        | No.popula-<br>tion 2018 | Pelvic<br>fracture | CIR per<br>100.000 | SIR per<br>100.000 | No.popula-<br>tion 2018 | Pelvic<br>fracture | CIR per<br>100.000 | SIR per<br>100.000 | No.popula-<br>tion 2018 | Pelvic<br>fracture | CIR per<br>100.000 | SIR per<br>100.000 |
|-----------------------|-------------------------|--------------------|--------------------|--------------------|-------------------------|--------------------|--------------------|--------------------|-------------------------|--------------------|--------------------|--------------------|
| 50-54                 | 359192                  | 192                | 53.5               | 359.1              | 355835                  | 142                | 39.9               | 268.1              | 715027                  | 334                | 46.7               | 313.8              |
| 55-59                 | 327395                  | 210                | 64.1               | 367.1              | 329338                  | 223                | 67.7               | 387.5              | 656733                  | 433                | 65.9               | 377.3              |
| 60-64                 | 258948                  | 210                | 81.1               | 394.6              | 274533                  | 217                | 79.0               | 384.7              | 533481                  | 427                | 80.0               | 389.5              |
| 65-69                 | 211529                  | 194                | 91.7               | 395.9              | 235911                  | 303                | 128.4              | 554.5              | 447440                  | 497                | 111.1              | 479.5              |
| 70-74                 | 175755                  | 248                | 141.1              | 565.3              | 208327                  | 458                | 219.8              | 880.7              | 384082                  | 706                | 183.8              | 736.4              |
| 75-79                 | 171171                  | 347                | 202.7              | 625.8              | 217475                  | 867                | 398.7              | 1230.6             | 388646                  | 1214               | 312.4              | 964.2              |
| 80-84                 | 86342                   | 267                | 309.2              | 664.8              | 126184                  | 840                | 665.7              | 1431.2             | 212526                  | 1107               | 520.9              | 1119.8             |
| 85-89                 | 51309                   | 260                | 506.7              | 718.7              | 93144                   | 961                | 1031.7             | 1463.3             | 144453                  | 1221               | 845.3              | 1198.8             |
| 90-94                 | 17893                   | 110                | 614.8              | 346.0              | 46741                   | 553                | 1183.1             | 665.8              | 64634                   | 663                | 1025.8             | 577.3              |
| ≥95                   | 3155                    | 28                 | 887.5              | 104.1              | 12948                   | 156                | 1204.8             | 141.3              | 16103                   | 184                | 1142.6             | 134.0              |
| Over-<br>all<br>(≥50) | 1662689                 | 2066               | 124.3              | 137.8              | 1900436                 | 4720               | 248.4              | 224.7              | 3563125                 | 6786               | 190.5              | 190.8              |

CIR Crude incidence rate; SIR standardized incidence rate; \*Incidence rate ratio = IR women/IR men

**Supplemental Table S3.** Absolute number of patients with a diagnose of pelvic fracture, per fracture location

| Location of the fracture<br>(ICD-10 code) <sup>1</sup>               | Men             |               | Women           |               |
|----------------------------------------------------------------------|-----------------|---------------|-----------------|---------------|
|                                                                      | Absolute number | Mean age (SD) | Absolute number | Mean age (SD) |
| Os sacrum (S32.1)                                                    | 1450            | 71.2 (12.0)   | 5811            | 78.1 (10.7)   |
| Os coccyges (S32.2.)                                                 | 127             | 70.5 (12.8)   | 343             | 75.9 (12.1)   |
| Os ilium (S32.3)                                                     | 592             | 69.9 (12.4)   | 792             | 78.9 (11.2)   |
| Os acetabulum (S32.4)                                                | 2416            | 72.1 (12.2)   | 2463            | 79.3 (10.6)   |
| Os pubis (S32.5)                                                     | 4294            | 75.2 (11.7)   | 18,559          | 80.9 (9.6)    |
| Os ischium (S32.6) <sup>2</sup>                                      | 1180            | 70.1 (12.3)   | 2553            | 78.0 (10.7)   |
| Multiple fractures                                                   | 997             | 68.3 (11.9)   | 1878            | 77.6 (11.1)   |
| Fracture of lumbar spine and pelvis, without specified subcode (S32) | 8429            | 70.7 (11.6)   | 15,624          | 76.3 (10.6)   |

<sup>1</sup>Sums of codes do not add up to the total number of pelvic fractures (n=54,975) because some patients had fracture on more locations of pelvis.

<sup>2</sup>Classification code for Os ischium in Austrian ICD-10 guidelines (*ICD-10 BMASGK 2020 – Systematisches Verzeichnis*) is S32.8

**Supplemental Table S4.** 7-days and 30-days all-cause mortality in a cohort of pelvic fracture patients and controls

|                          | Pelvic fractures | Controls        |
|--------------------------|------------------|-----------------|
| <b>7-days mortality</b>  | 0.5%<br>(n=256)  | 0.5%<br>(n=254) |
| <b>30-days mortality</b> | 2.0%<br>(n=1056) | 1.6%<br>(n=895) |

**Supplemental Figure S1.** The log(-log) plots for assesment of proportional hazards in age category 50-64 years old.

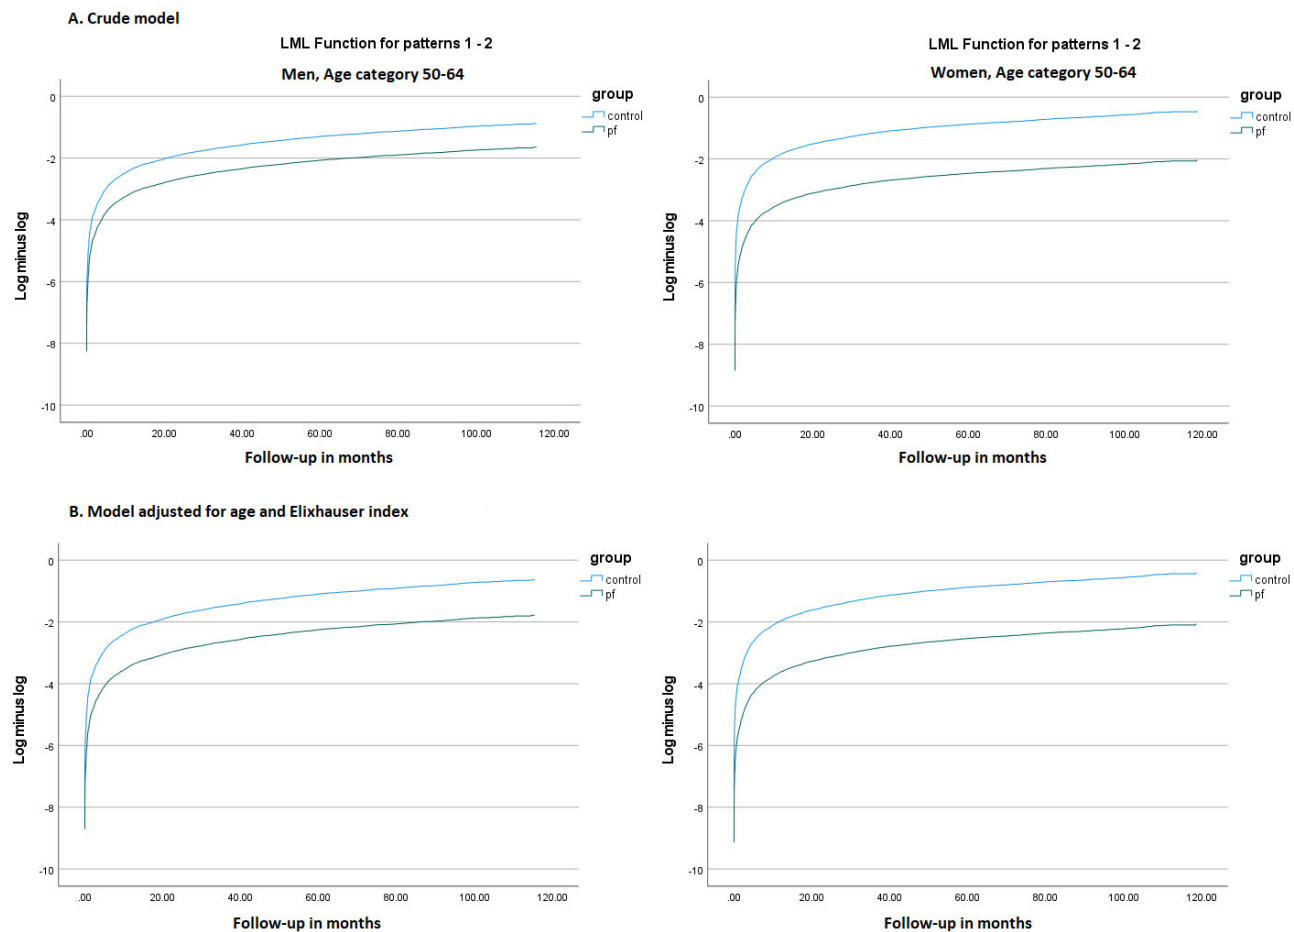



**Supplemental Figure S2.** The log(-log) plots for assesment of proportional hazards in age category  $\geq 65$  years old.

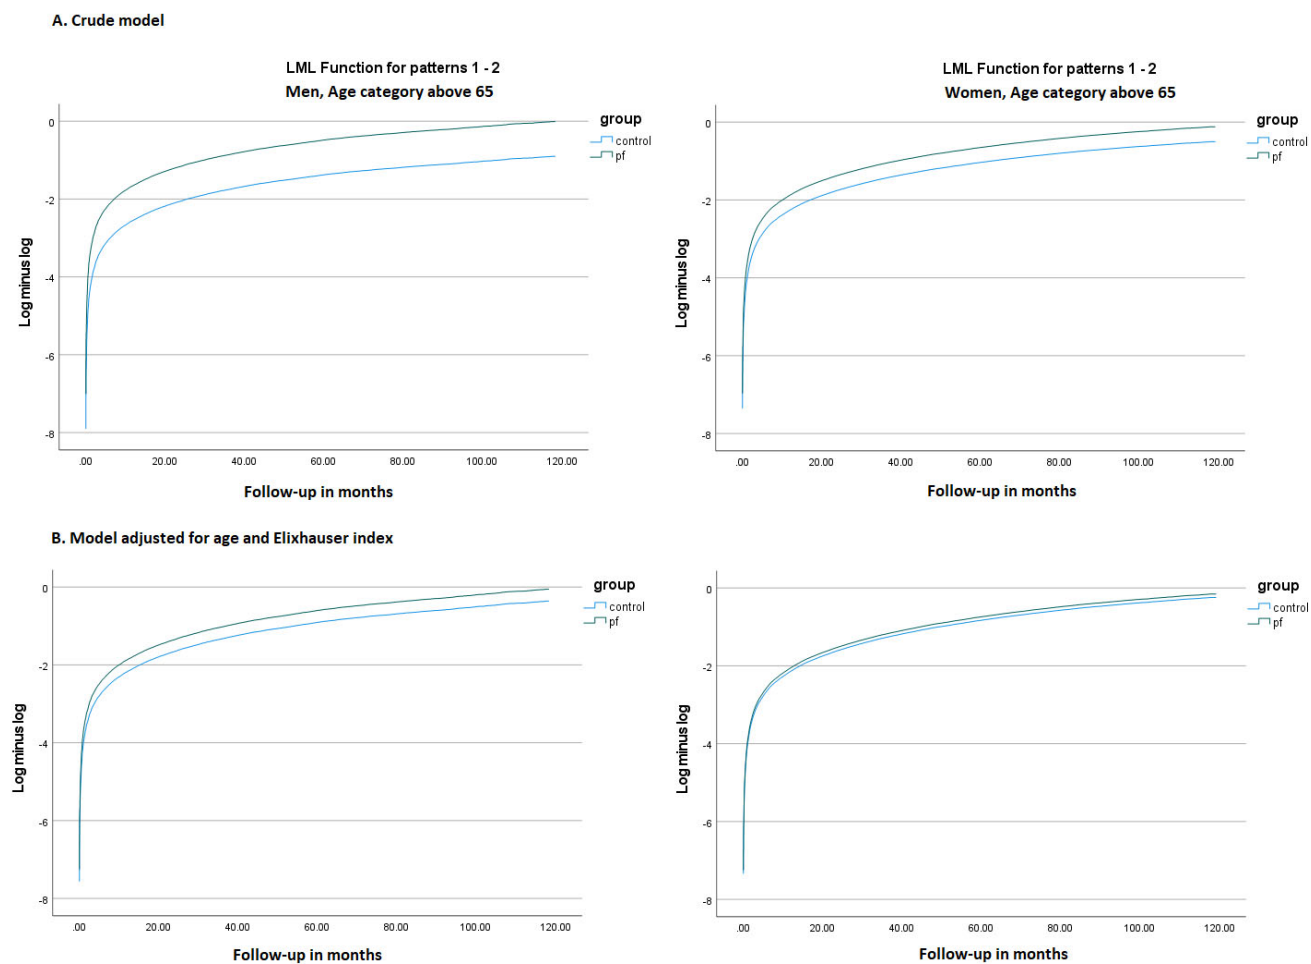

Supplement: s1 [file s1]
